# Supplementary material
Source: publisher figshare collection journal article supplement (https://frontiersin.figshare.com/ndownloader/files/25712387)
Supplement: Supplementary file [file 25712387]

Supplementary Figures

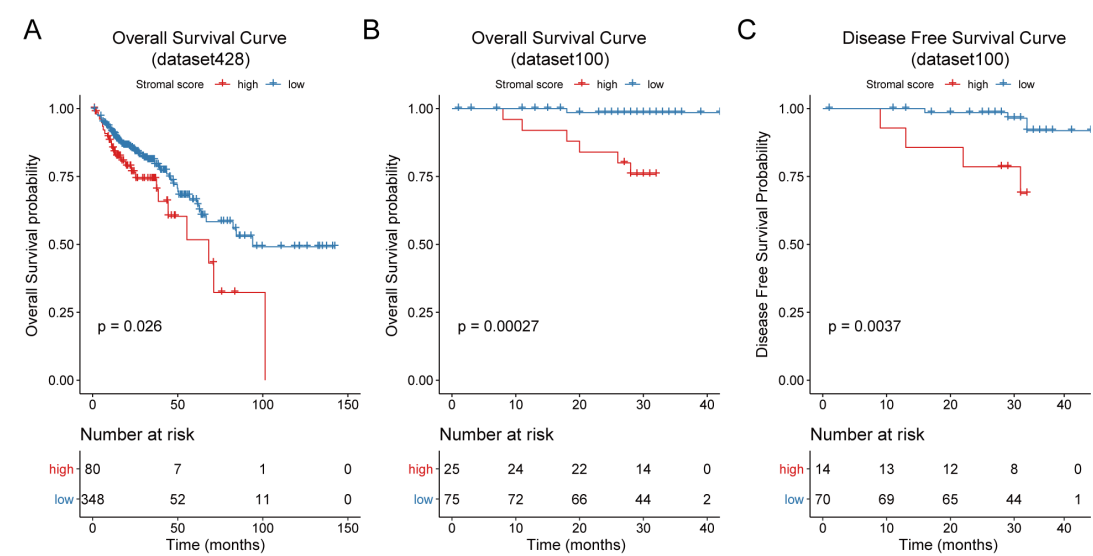

**Supplementary Figure 1.** Correlations between the ESTIMATE stromal score and CC survival prognosis were validated in testing sets of dataset428 **(A)** and dataset100 **(B-C)**.

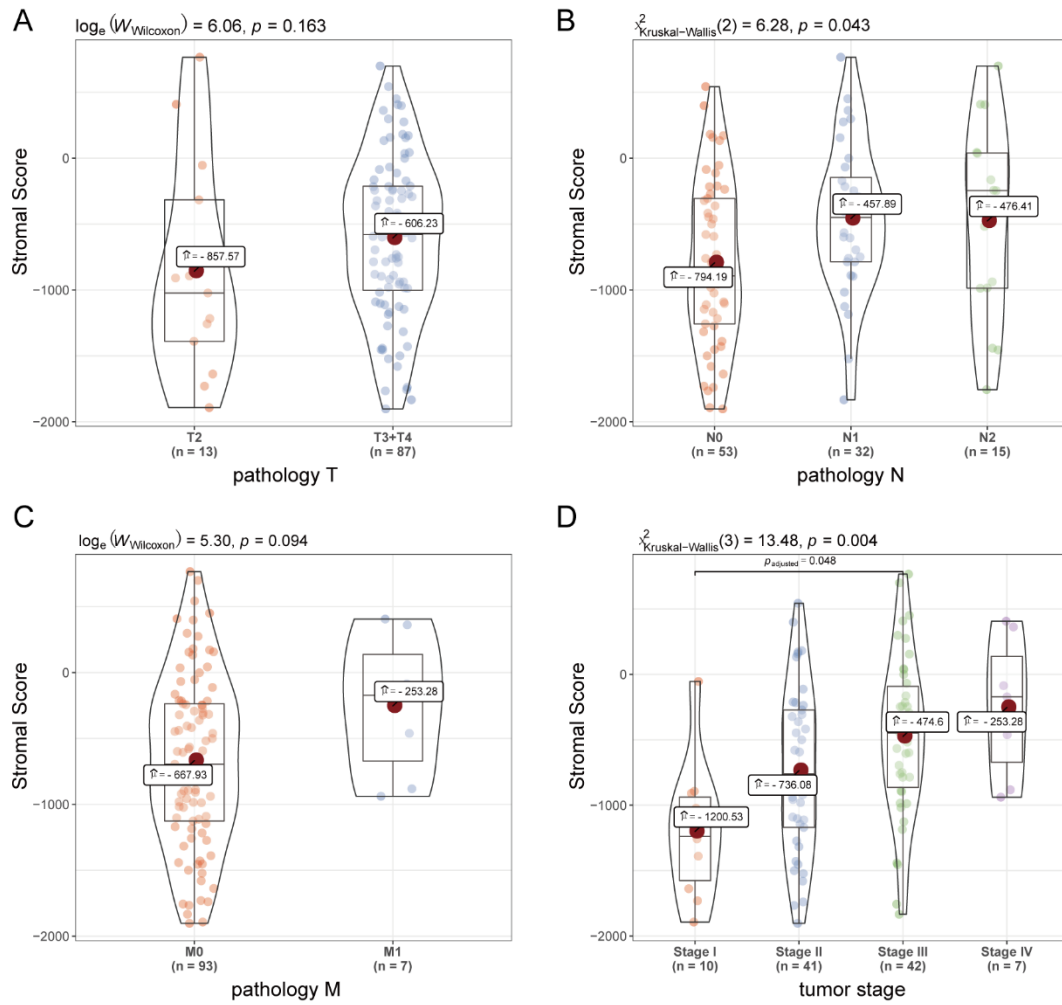

**Supplementary Figure 2.** Association between the ESTIMATE stromal score and clinical features of pathologic T (A), pathologic N (B), pathologic M (C), tumor stage (D) were validated in the testing set of dataset100.

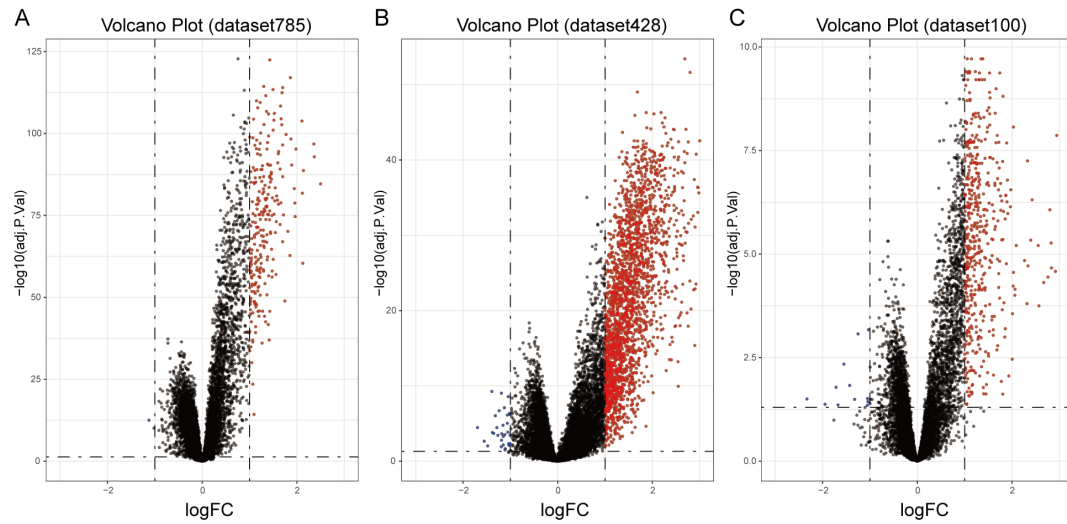

**Supplementary Figure 3.** Volcano plots of differential expressed genes between the high and low ESTIMATE stromal score groups. **(A)** 246 DEGs in dataset785. **(B)** 2313 DEGs in dataset428. **(C)** 501 DEGs in dataset100. Red and blue indicate up- and down-regulated genes, respectively.

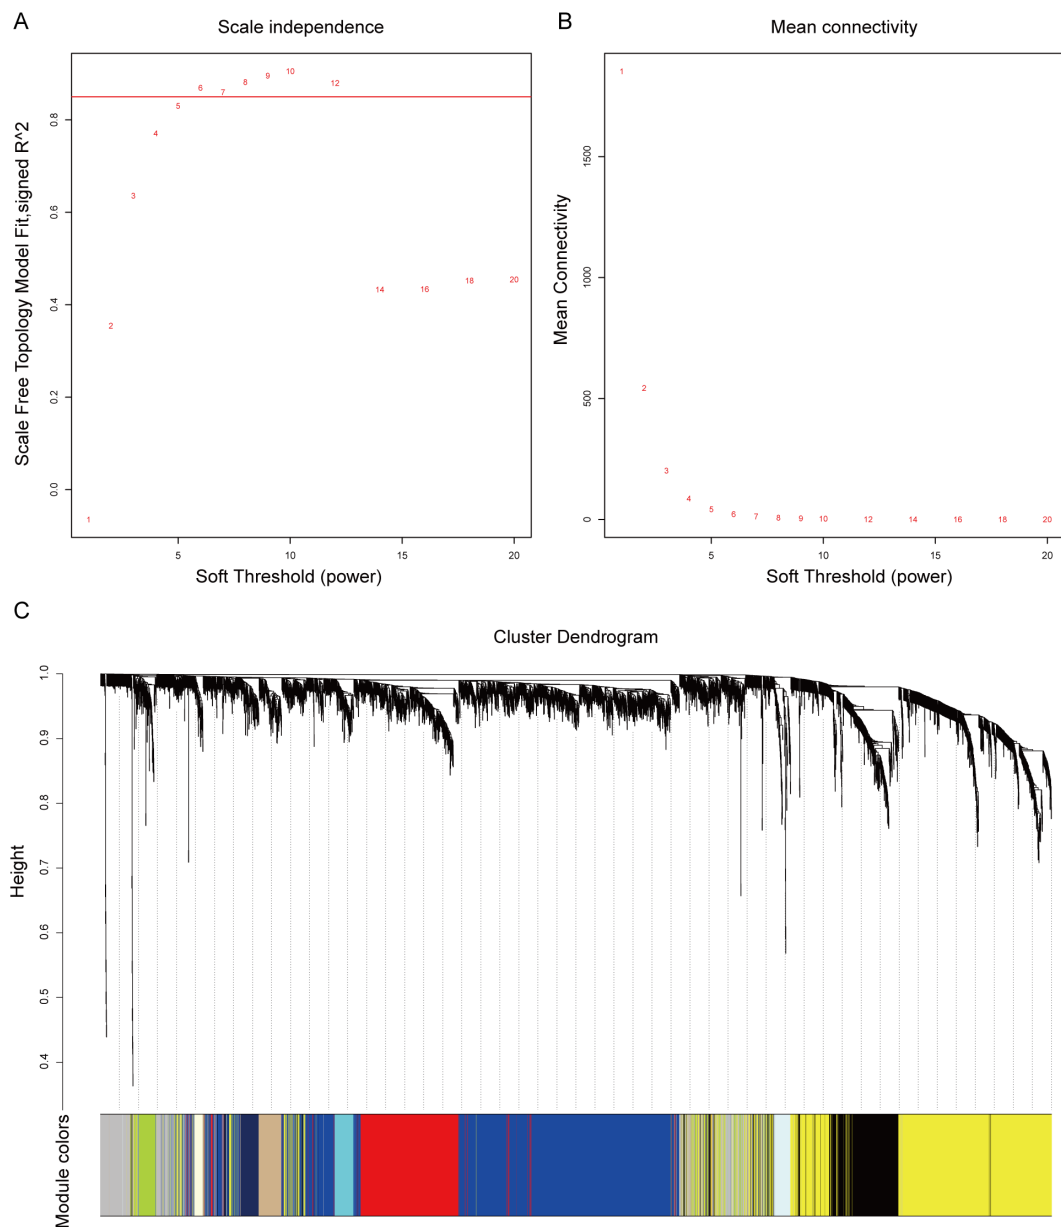

**Supplementary Figure 4.** Weighted gene co-expression network construction. **(A-B)** The scale-free fit index and the mean connectivity with various soft-thresholding powers, 6 was selected as the appropriate sort-thresholding power based on the cutoff of 0.85. **(C)** Clustering dendrograms of 21 mRNA modules.





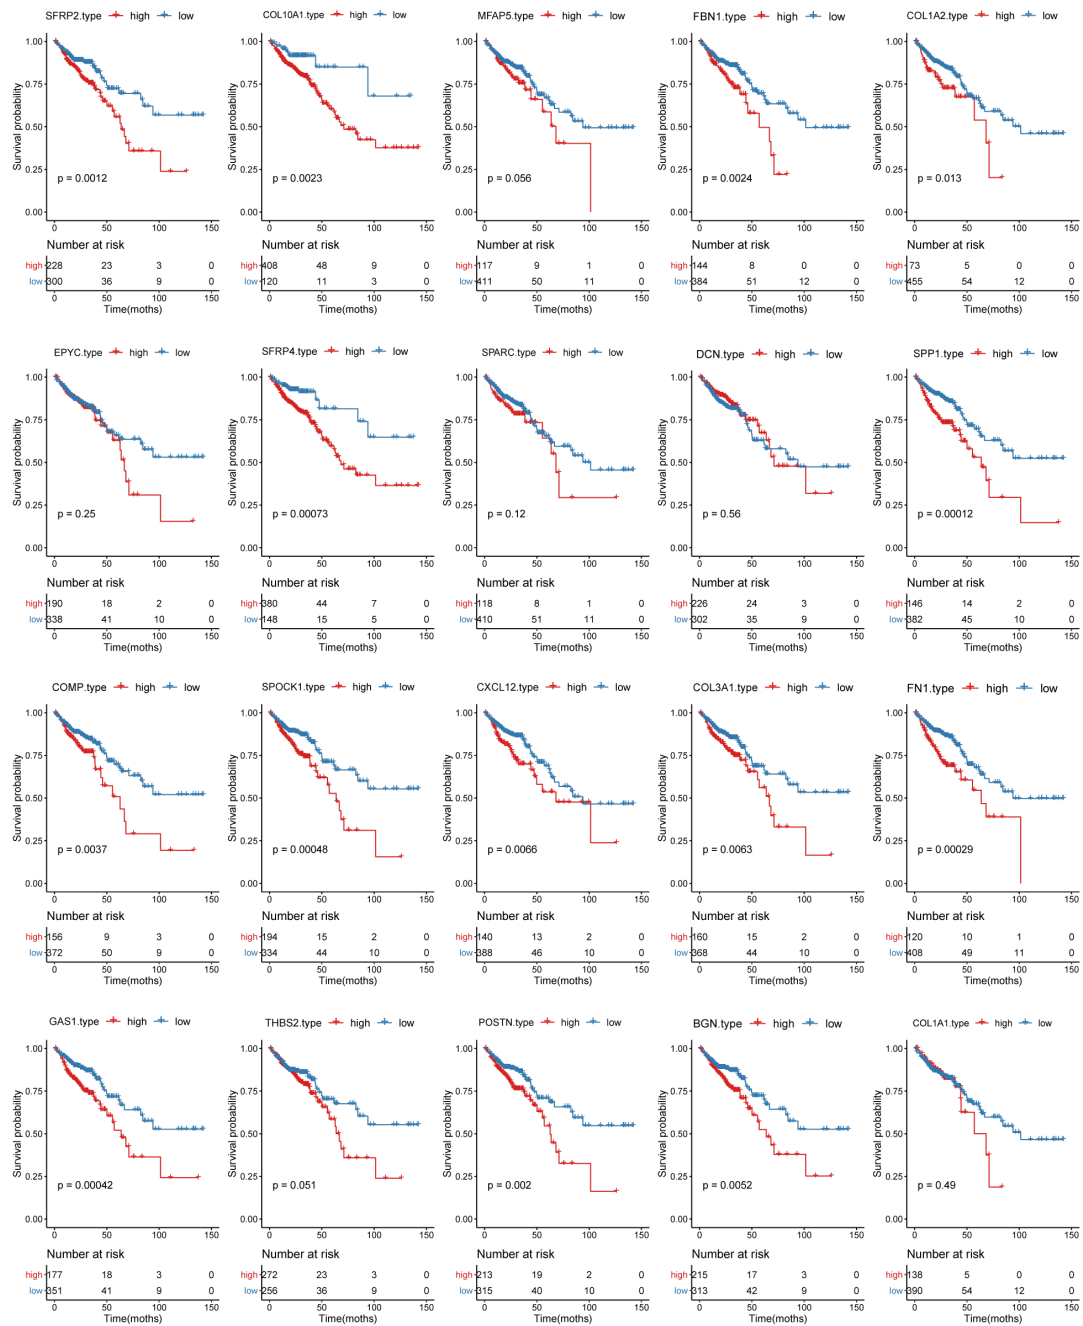

**Supplementary Figure 7.** A total of 528 patients from the testing datasets of dataset428 and dataset100 were used to validate the relationship of the 20 candidate biomarkers with survival prognosis. 4 candidate biomarkers (SPARC, DCN, COL1A1, EPYC) were not statistically significant and were filtered out.

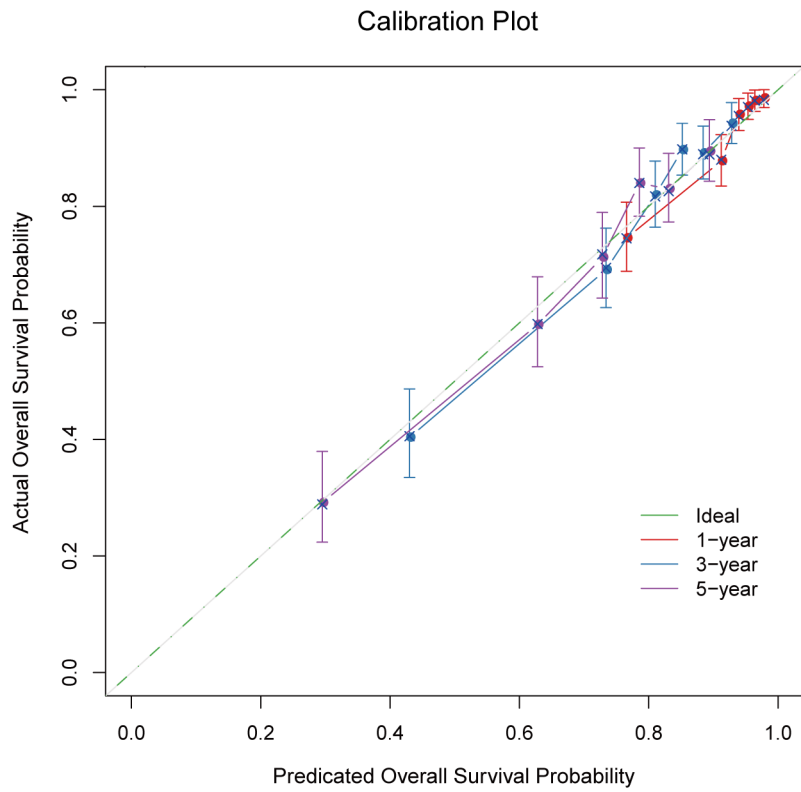

**Supplementary Figure 8.** The calibration plot showed the nomogram plot performed well compared against an ideal model for 1-, 3-, and 5-year overall survival prediction.



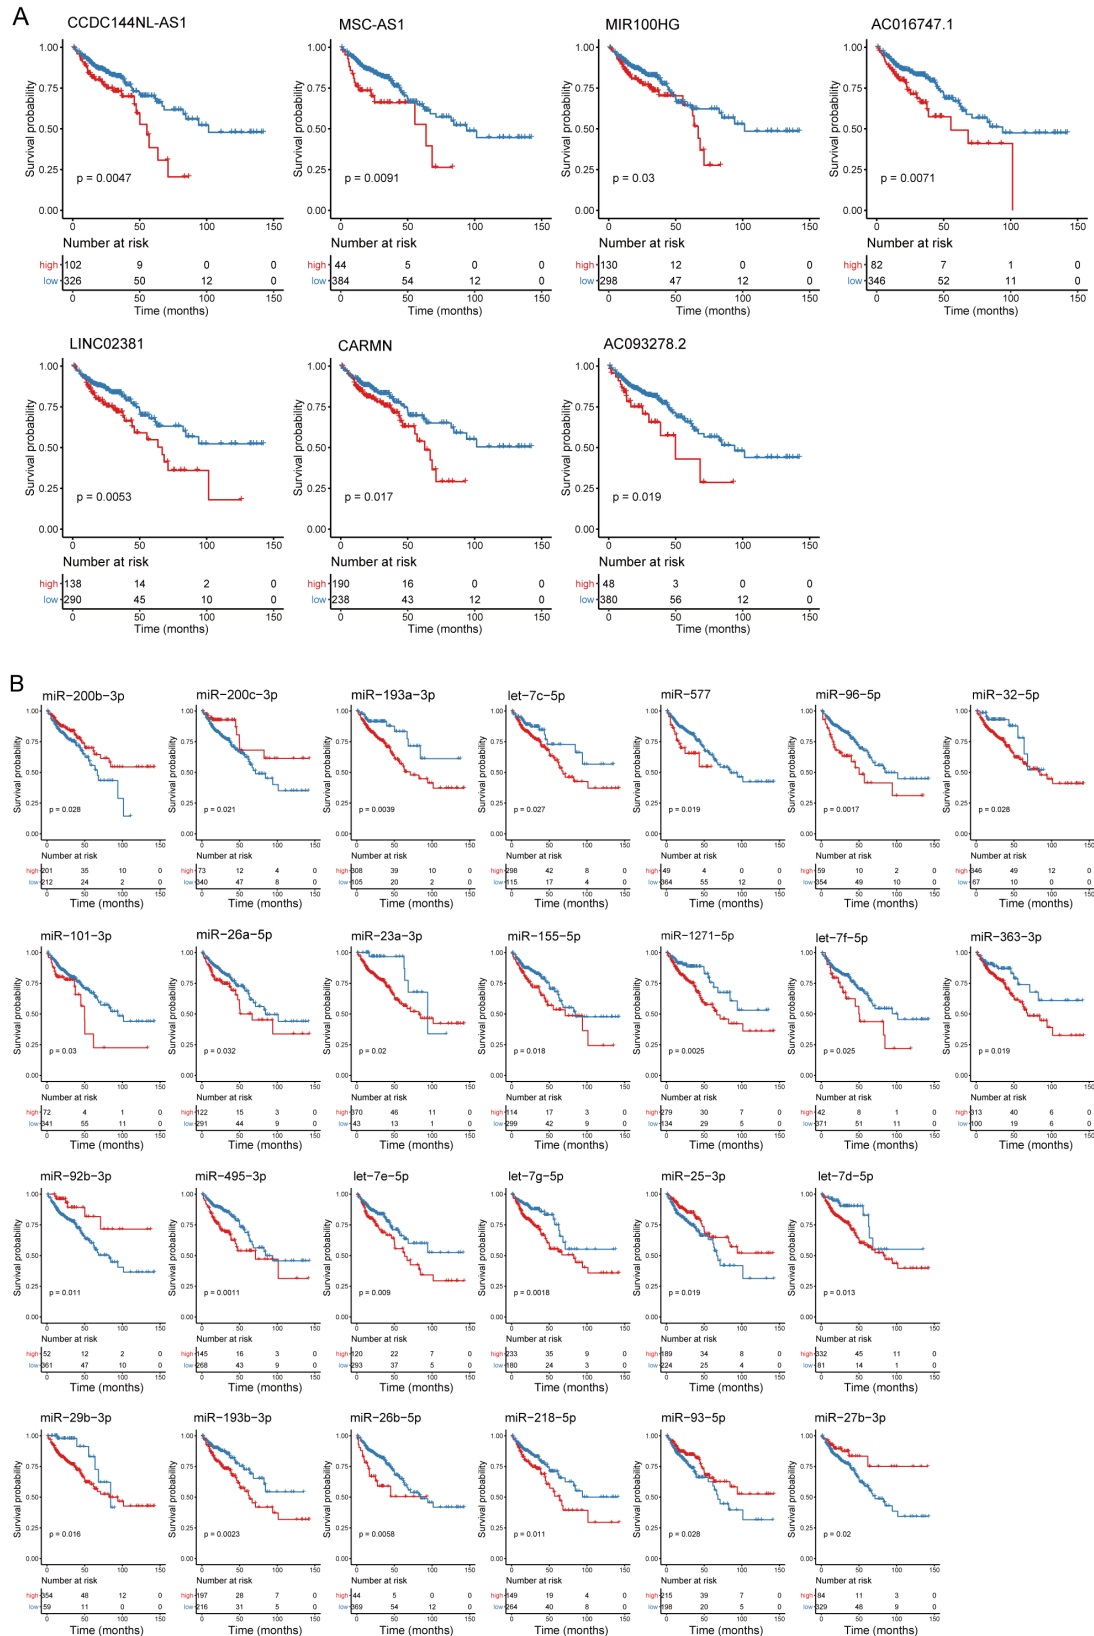

**Supplementary Figure 9.** Kaplan-Meier survival curves of 7 lncRNAs (**A**) and 26 miRNAs (**B**) in the ceRNA regulatory network. All these genes were statistically significant ( $p < 0.05$ ).
